# Supplementary material
Source: PubMed Central journal article supplement (PMC4044837)
Supplement: supp_pp.114.238071_238071suppfig.pdf [file supp_pp.114.238071_238071suppfig.pdf]

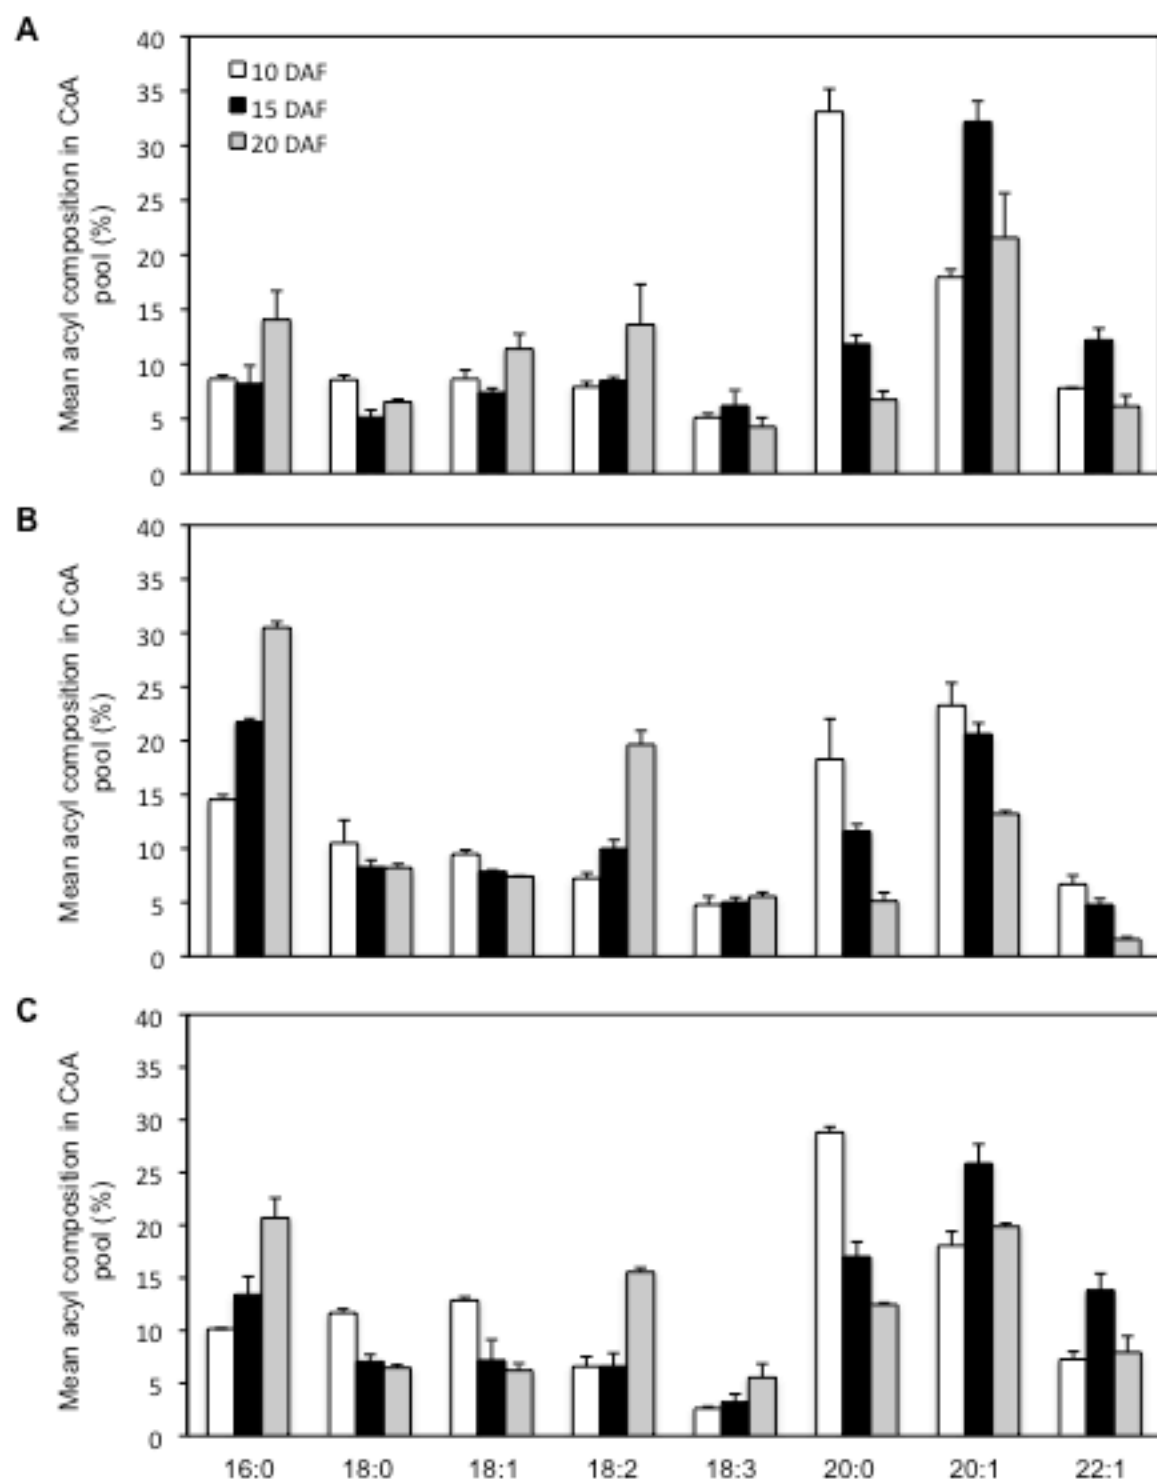

**Supplemental Figure 1.** Acyl composition of the total acyl-CoA pool from Arabidopsis WT (A), ACBP (B) and OleoH3P-ACBP (C) T<sub>3</sub> developing seeds at 10 DAF, 15 DAF and 20 DAF. Each block denotes the mean molar percentage of the particular acyl group within the seeds of 4 independent lines bearing each construct, respectively, as well as 4 untransformed WT control plants. Bars represent standard deviations.
